# Supplementary material for: OPPL-Galaxy, a Galaxy tool for enhancing ontology exploitation as part of bioinformatics workflows
Source: Springer Nature journal article supplement (doi:10.1186/2041-1480-4-2), 2013-01-01

Class: Mitochondrion  
SubClassOf:  
Organelle,  
has\_part some Mitochondrial\_protein

Class: Mitochondrial\_protein  
SubClassOf:  
part\_of some (Lipid\_membrane  
and (adjacent\_to some Mitochondrial\_matrix))

Class: Lipid\_membrane

Individual: Cyb2  
Types: Cytoplasm\_protein

Class: Cytoplasm\_protein

Individual: IMP  
Types: Mitochondrial\_protein  
Facts: cleaves Cyb2

Class: Mitochondrial\_matrix

Class: Organelle

Organelle

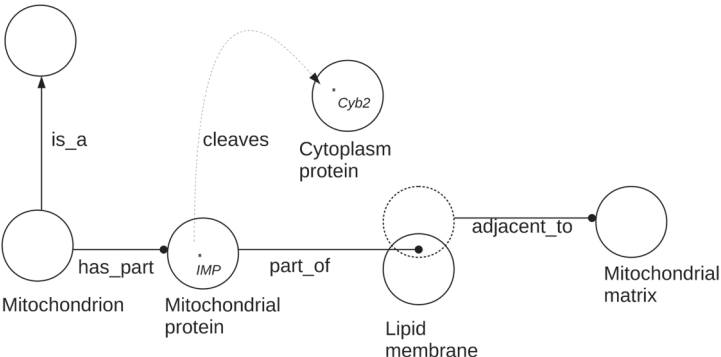

Supplement: 13326_2012_124_MOESM1_ESM.pdf [file 13326_2012_124_MOESM1_ESM.pdf]
