# Supplementary material for: OPPL-Galaxy, a Galaxy tool for enhancing ontology exploitation as part of bioinformatics workflows
Source: Springer Nature journal article supplement (doi:10.1186/2041-1480-4-2), 2013-01-01

Ontology

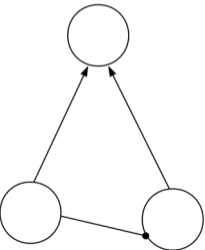

OPPL script

```
?agent:CLASS,  
?process:CLASS  
SELECT ?agent SubClassOf participates_in some ?process  
WHERE ?agent != Nothing  
BEGIN  
ADD ?agent SubClassOf participates_in only ?process  
END;
```

OPPL engine

Modified ontology

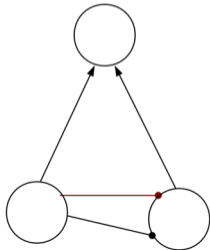

Supplement: 13326_2012_124_MOESM2_ESM.pdf [file 13326_2012_124_MOESM2_ESM.pdf]
