# Supplementary material for: OPPL-Galaxy, a Galaxy tool for enhancing ontology exploitation as part of bioinformatics workflows
Source: Springer Nature journal article supplement (doi:10.1186/2041-1480-4-2), 2013-01-01

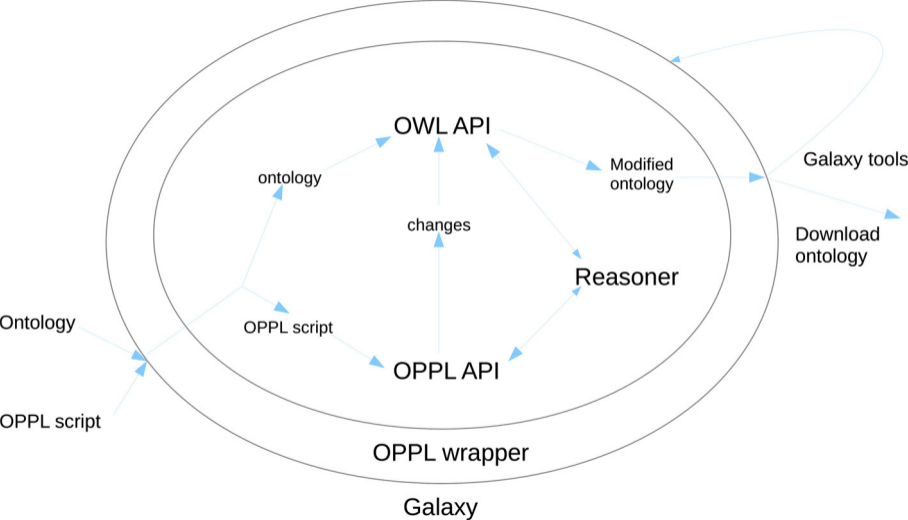

Supplement: 13326_2012_124_MOESM3_ESM.pdf [file 13326_2012_124_MOESM3_ESM.pdf]
