# Supplementary material for: OPPL-Galaxy, a Galaxy tool for enhancing ontology exploitation as part of bioinformatics workflows
Source: Springer Nature journal article supplement (doi:10.1186/2041-1480-4-2), 2013-01-01
Supplement: 13326_2012_124_MOESM4_ESM.pdf [file 13326_2012_124_MOESM4_ESM.pdf]

## Tools

Options ▾

[Get Data](#)  
[Send Data](#)  
[ENCODE Tools](#)  
[Lift-Over](#)  
[Text Manipulation](#)  
[Filter and Sort](#)  
[Join, Subtract and Group](#)  
[Convert Formats](#)  
[Extract Features](#)  
[Fetch Sequences](#)  
[Fetch Alignments](#)  
[Get Genomic](#)

## Execute an OPPL file against an ontology

Input ontology file:

6: gene\_ontology.1\_2..s\_fixed.owl ▾

Choose reasoner:

Pellet ▾

OPPL file:

5: Disjoint\_localisation.oppl ▾

Choose ontology output format:

OWL ▾

Execute

## History

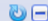

Unnamed history

[21: Compare two Datasets](#)[20: Get the terms that are data 19](#)[19: Execute an OPPL file a](#)[18: Hepatocyte part of re](#)[14: Execute an OPPL file a](#)
