# Supplementary material for: OPPL-Galaxy, a Galaxy tool for enhancing ontology exploitation as part of bioinformatics workflows
Source: Springer Nature journal article supplement (doi:10.1186/2041-1480-4-2), 2013-01-01

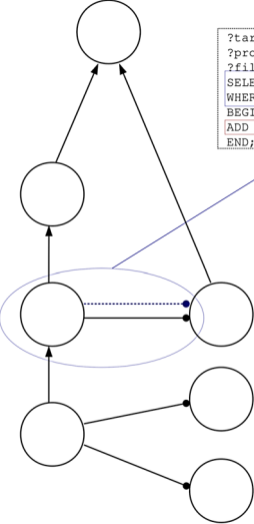

```
?target:CLASS,  
?prop:OBJECTPROPERTY,  
?filler:CLASS  
SELECT ASSERTED ?target SubClassOf ?prop only ?filler  
WHERE FAIL ?target SubClassOf ?prop some ?filler  
BEGIN  
ADD ?target SubClassOf !OnlyBadPracticeResult  
END;
```

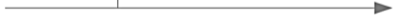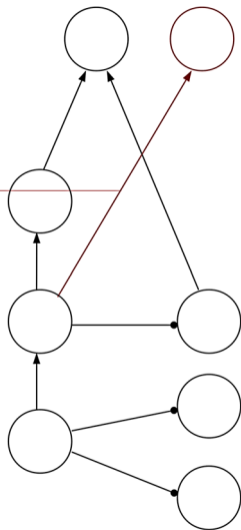

Supplement: 13326_2012_124_MOESM6_ESM.pdf [file 13326_2012_124_MOESM6_ESM.pdf]
