# Supplementary material for: OPPL-Galaxy, a Galaxy tool for enhancing ontology exploitation as part of bioinformatics workflows
Source: Springer Nature journal article supplement (doi:10.1186/2041-1480-4-2), 2013-01-01
Supplement: 13326_2012_124_MOESM7_ESM.pdf [file 13326_2012_124_MOESM7_ESM.pdf]

Input ontology file:

OPPL query file:

Choose reasoner:

Choose how to render the retrieved entities:

## About OPPL-Query-Galaxy

OPPL-Query-Galaxy can be used to execute an OPPL query against an OWL ontology. The result is a two column table with the entities that have been bound by the variables.

## Usage

An ontology is needed as input: load it with Get Data >> Upload File from your computer or redirect the output of another galaxy tool. OPPL-Query-Galaxy uses the OWL API, and therefore it can load any ontology format that such API is able to load: OBO flat file, OWL (RDF/XML, OWL/XML, Functional, Manchester), turtle, and KRSS. In case the loaded ontology includes OWL imports, OPPL-Query-Galaxy will try to resolve them.

An OPPL query must be provided in a file: an OPPL query is an OPPL script without the actions part, e.g. `?whole:CLASS, ?part:CLASS SELECT ?part SubClassOf part_of some ?whole WHERE ?part != Nothing.`

The reasoner can be Pellet, HermiT, FaCT++ or Elk.

The returned entities can be rendered using their URI, their URI fragment, or OBO type URI fragment (e.g. `GO_0000022` to `GO:0000022`).
