# Supplementary material for: OPPL-Galaxy, a Galaxy tool for enhancing ontology exploitation as part of bioinformatics workflows
Source: Springer Nature journal article supplement (doi:10.1186/2041-1480-4-2), 2013-01-01
Supplement: 13326_2012_124_MOESM9_ESM.pdf [file 13326_2012_124_MOESM9_ESM.pdf]

|           |               |         |            |
|-----------|---------------|---------|------------|
| UniProtKB | <b>P12235</b> | SLC25A4 | GO:0000002 |
| UniProtKB | <b>P19971</b> | TYMP    | GO:0000002 |
| UniProtKB | <b>P36776</b> | LONP1   | GO:0000005 |

## Gene Ontology

Compare to  
GAF file

GO:0000002  
GO:0000005

Query GO

## GAF file

|           |        |         |            |
|-----------|--------|---------|------------|
| UniProtKB | P12235 | SLC25A4 | GO:0000002 |
| UniProtKB | P19971 | TYMP    | GO:0000002 |
| UniProtKB | P36776 | LONP1   | GO:0000005 |
| UniProtKB | P39210 | MPV17   | GO:0000003 |

## OPPL-Query file

```
?hepatocyte_process:CLASS,
?hepatocyte_process_label:CONSTANT = MATCH("?.hepatocyte.+"),
?part_of_or_regulates:OBJECTPROPERTY
SELECT ?hepatocyte_process.IRI label ?hepatocyte_process_label,
?hepatocyte_process subClassOf ?part_of_or_regulates some GO_0008150
```
