# Supplementary material for: OPPL-Galaxy, a Galaxy tool for enhancing ontology exploitation as part of bioinformatics workflows
Source: Springer Nature journal article supplement (doi:10.1186/2041-1480-4-2), 2013-01-01

```
?process:CLASS,  
?parent_process:CLASS,  
?gene:CLASS  
SELECT ?gene subClassOf RO_0002214 some  
(RO_0002217 some (?process and BFO_0000050 some ?parent_process))  
WHERE ?parent_process != GO_0008150  
BEGIN  
ADD ?gene SubClassOf RO_0002217 some ?parent_process  
END;
```

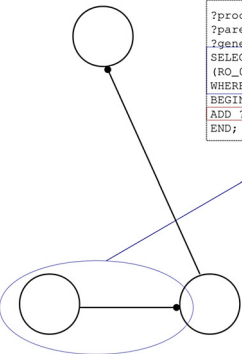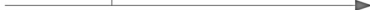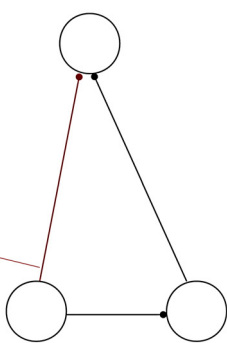

Supplement: 13326_2012_124_MOESM10_ESM.pdf [file 13326_2012_124_MOESM10_ESM.pdf]
