# Supplementary material for: OPPL-Galaxy, a Galaxy tool for enhancing ontology exploitation as part of bioinformatics workflows
Source: Springer Nature journal article supplement (doi:10.1186/2041-1480-4-2), 2013-01-01
Supplement: 13326_2012_124_MOESM12_ESM.pdf [file 13326_2012_124_MOESM12_ESM.pdf]

## Perform an OWL query against an ontology

### Input ontology file:

### Query:

### Choose reasoner:

### Choose answer type:

### Choose how to render the retrieved entities:

## About Query-Galaxy

Query-Galaxy can be used to execute a DL query against an OWL ontology (e.g. GO\_0007049 or part\_of some GO\_0007049). The result is a list of entities from the target ontology. How those entities relate to the query can be chosen (A DL query is just an anonymous OWL Class).

## Formats

Inference-Galaxy uses the OWL API, and therefore it can load any ontology format that such API is able to load: OBO flat file, OWL (RDF/XML, OWL/XML, Functional, Manchester), turtle, and KRSS. The output is a list of terms.

## Contact

Please send any request or comment to [mikel.egana.aranguren@gmail.com](mailto:mikel.egana.aranguren@gmail.com).
