# Supplementary material for: OPPL-Galaxy, a Galaxy tool for enhancing ontology exploitation as part of bioinformatics workflows
Source: Springer Nature journal article supplement (doi:10.1186/2041-1480-4-2), 2013-01-01
Supplement: 13326_2012_124_MOESM15_ESM.pdf [file 13326_2012_124_MOESM15_ESM.pdf]

```

?x:CLASS,
?y:INDIVIDUAL = create(?x.RENDERING)
SELECT ?x SubClassOf Thing
WHERE ?x != Nothing, ?x != Thing
BEGIN
ADD ?y Type ?x
END;

```

```

?x:CLASS,
?y:INDIVIDUAL,
?z:CLASS,
?w:INDIVIDUAL,
?p:OBJECTPROPERTY
SELECT ASSERTED ?x SubClassOf ?p some ?z,
ASSERTED ?y Type ?x, ASSERTED ?w Type ?z
WHERE ?x != Nothing, ?x != Thing
BEGIN
ADD ?y ?p ?w
END;

```

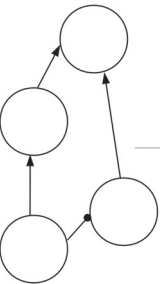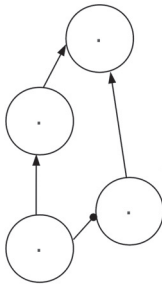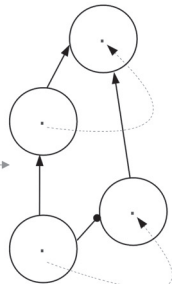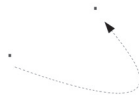

```

PREFIX q: <http://www.ont.owl#>
SELECT ?a WHERE {
  ?a q:p q:D .
}

```
